1 **Genome sequence and analysis of the eggplant (*Solanum melongena* L.)**

2

3 Dandan Li<sup>1</sup>, Jun Qian<sup>2</sup>, Wenjia Li<sup>1</sup>, Yaqin Jiang<sup>1</sup>, Guiyun Gan<sup>1</sup>, Weiliu Li<sup>1</sup>, Riyuan Chen<sup>1</sup>, Ning Yu<sup>1</sup>,

4 Yan Li<sup>1</sup>, Yongguan Wu<sup>1</sup>, Dexian Kang<sup>1</sup>, Jinmin Lian<sup>2</sup>, Yongchao Niu<sup>2</sup> and Yikui Wang<sup>1,\*</sup>

5

6 <sup>1</sup>*Institute of Vegetable Research, Guangxi Academy of Agricultural Sciences, Nanning, China*

7 <sup>2</sup>*Biozeron Shenzhen, Inc., Shenzhen, China*

8 \*Correspondence (Tel +86-771-3186-372; email ykwang@gxaas.net)

9 **Running Head:** Eggplant genome

10

11

## 12 **Summary**

13 The eggplant (*Solanum melongena* L.) is one of the most important Solanaceae crops, ranking third in  
14 the total production and economic value in the genus *Solanum*. Here, we report a high-quality,  
15 chromosome-scale eggplant reference genome sequence of 1,155.8 Mb, with N50 of 93.9 Mb, which  
16 was assembled by combining PacBio long reads and Hi-C sequencing data. Repetitive sequences  
17 occupied 70.1% of the assembly length, and 35,018 high-confidence protein-coding genes were  
18 annotated based on multiple evidence. Comparative analysis revealed 646 species-specific families  
19 and 364 positive selection genes, conferring distinguishing traits to the eggplant. We performed  
20 genome-wide identification of disease resistance genes and discovered an expanded gene family of  
21 bacterial spot resistance in the eggplant and pepper but not in tomato and potato. The genes involved  
22 in chlorogenic acid synthesis were comprehensively characterized. Highly similar chromosomal  
23 distribution patterns of polyphenol oxidase genes were observed in the eggplant, tomato, and potato  
24 genomes. The eggplant reference genome sequence will not only facilitate evolutionary studies in the  
25 Solanaceae but also facilitate their breeding and improvement.

26

27 **Keywords:** eggplant, *Solanum melongena*, genome sequencing, evolution, disease resistance,  
28 chlorogenic acid, transcription factors

29

## 30 **Introduction**

31 Solanaceae plants are medium-sized angiosperms; they are the largest group of vegetable crops and  
32 the third largest group of economic plants. The taxa in the Solanaceae family are abundant and  
33 diverse, with 90 genera and 3,000–4,000 species. This family includes many important crop species,  
34 e.g., food crops such as potato (*Solanum tuberosum*), vegetables such as tomato (*Solanum*  
35 *lycopersicum*), eggplant (*Solanum melongena* L.), and pepper (*Capsicum annuum*), raw industrial  
36 materials such as tobacco (*Nicotiana tabacum*) [1, 2], and certain plant models used in research (e.g.,  
37 *Nicotiana* spp., *Solanum* spp., *Petunia* spp., and *Datura* spp.) [3, 4]. Therefore, Solanaceae plants play  
38 an important role in agricultural economics and scientific research [5-8].

39 The eggplant, exclusively native to the Old World, belongs to the largest genus of the  
40 Solanaceae, *Solanum*, and has been listed by the Food and Agriculture Organization as the fourth  
41 largest vegetable crop. The world production of eggplants was approximately 52.3 million tons in  
42 2017, with China being the main producer. Previous studies of the eggplant focused on the evolution  
43 [9-12], genetic linkage map [13, 14], molecular marker development [15, 16], resistance [17, 18], fruit  
44 quality [19, 20], and high-throughput genotyping [20, 21].

45 However, given the lack of comprehensive studies on the eggplant genome, only 775 pathogen  
46 recognition genes have been reported in the eggplant, compared to more than 1,000 genes in each of  
47 the three other Solanaceae crops (tomato, pepper, and potato) [22], which influences the progress of  
48 studies on the evolution of disease resistance in different Solanaceae plants [23]. Eggplants are the  
49 richest source of chlorogenic acid (CGA; 5-*O*-caffeoylquinic acid) [24, 25]. This dietary phenolic acid  
50 has been proven to exhibit anti-inflammatory, antimutagenic, and antiproliferative activities; however,  
51 the mechanism of CGA formation in the eggplant has not been well elucidated [26, 27]. Therefore, a  
52 high-quality reference genome is urgently needed for eggplant research. Two published eggplant  
53 references (SME\_r2.5.1 and Eggplant\_V3) [13, 28] were obtained by mainly employing the Illumina  
54 short-read sequencing technology, thus exhibiting assembly fragmentation and significant gap sizes.

55 To facilitate our understanding of the eggplant biology and evolution, we generated a  
56 chromosome-scale reference genome assembly of a cultivated eggplant variety, ‘guiqie1’, and  
57 analyzed the sequence in comparison with those of other members of the Solanaceae. Our work  
58 provides the fundamental information for unraveling the evolution and domestication of the eggplant  
59 and may ultimately lead to further improvement of this important worldwide crop.

60

## 61 **Results and Discussion**

### 62 **Genome sequencing, assembly, and annotation**

63 We performed genome sequencing of the eggplant with the PacBio Sequel platform using a set of 15  
64 SMRTcells, which yielded a total of 114.5 Gb of data (average polymerase read length: 14.5 kb)  
65 (Table S1). The PacBio-only assembly contained 625 contigs, with a total length of 1,155.8 Mb and  
66 an N50 length of 5.3 Mb (maximum contig length: 21.7 Mb) (Table 1). Subsequently, we used  
67 Dovetail Hi-C data (80.7 Gb) to refine this assembly. Of the 625 contigs, 318 were sorted into 12  
68 superscaffolds, accounting for 97.1% of the original 1,155.8-Mb assembly. The superscaffolds were  
69 further anchored to 12 linkage groups to form pseudochromosomes (Figure S1), with N50 of 93.9 Mb  
70 and a maximum length of 112 Mb (Table 1). The number of pseudochromosomes ( $n = 12$ )  
71 corresponded to the number of chromosomes in the eggplant and many members of the Solanaceae  
72 [29, 30].

73

74 **Table 1** Comparison of eggplant assemblies.

| Assembly feature | New assembly<br>(guiqie1) | Eggplant_V3 <sup>†</sup> | SME_r2.5.1 |
|------------------|---------------------------|--------------------------|------------|
|------------------|---------------------------|--------------------------|------------|

---

|                                   |                  |                   |                 |
|-----------------------------------|------------------|-------------------|-----------------|
| Size of assembly                  | 1,155.8 Mb       | 1,474.9 Mb        | 833.1 Mb        |
| Number of scaffolds               | 319              | 10,383            | 33,873          |
| Contig N50                        | 5.3 Mb           | 16.7 kb           | 14.3 kb         |
| Pseudochromosome/scaffold N50     | 93.9 Mb          | 100.4 Mb          | 64.5 kb         |
| Longest pseudochromosome/scaffold | 112 Mb           | 142 Mb            | 630 kb          |
| GC content (%)                    | 36.1             | 36.0              | 35.7            |
| Repeat content (%)                | 70.1             | 73                | 70.4            |
| Number of genes                   | 35,018           | 34,916            | 85,446          |
| Size of Ns/gaps (%)               | 32.5 kb (0.003%) | 416.4 Mb (28.23%) | 39.6 Mb (4.75%) |

---

75 †Eggplant\_V3 assembly was downloaded from  
76 [https://solgenomics.net/organism/Solanum\\_melongena/genome](https://solgenomics.net/organism/Solanum_melongena/genome)

77

78 Benchmarking Universal Single-Copy Ortholog (BUSCO) evaluations of the genome sequence  
79 revealed 96.2% completeness. Compared with the previously published eggplant genomes  
80 (SME\_r2.5.1 and Eggplant\_V3) [13, 28], which both mainly employed the Illumina short-read  
81 sequencing technology, resulting in more fragmented assemblies (contig N50 lengths: 14.3 and 16.7  
82 kb, respectively) and larger gap sizes (Ns: 4.75% and 28.23%, respectively), our genome assembly  
83 achieved a great improvement in both quality and integrity (Table 1 and Table S2).

84 To validate the superscaffolds, we mapped the 952 DNA markers of linkage map LWA2010 [31]  
85 to the eggplant assembly with BWA-MEM [32] and obtained the best mapped position for each  
86 marker; a total of 946 (99.4%) markers could be mapped onto the 12 superscaffolds (Table S3). Then,  
87 ALLMAPS [33] was used with default parameters to assign the superscaffolds to each  
88 pseudochromosome, and a high value of the Pearson correlation coefficient ( $\rho$ -value > 0.9) between  
89 the physical position and map location of genetic markers indicated a high quality of the eggplant  
90 assembly (Figure S2). We also aligned the markers of linkage map LWA2010 to the Eggplant\_V3  
91 assembly and found that 832 (87.4%) markers could be assigned to the 12 pseudochromosomes  
92 (Table S4), which was less than that obtained using our data (99.4%). Generally, the  
93 pseudochromosomes showed a good collinearity between the new eggplant and Eggplant\_V3  
94 assemblies (Figure 1 and Table S5).

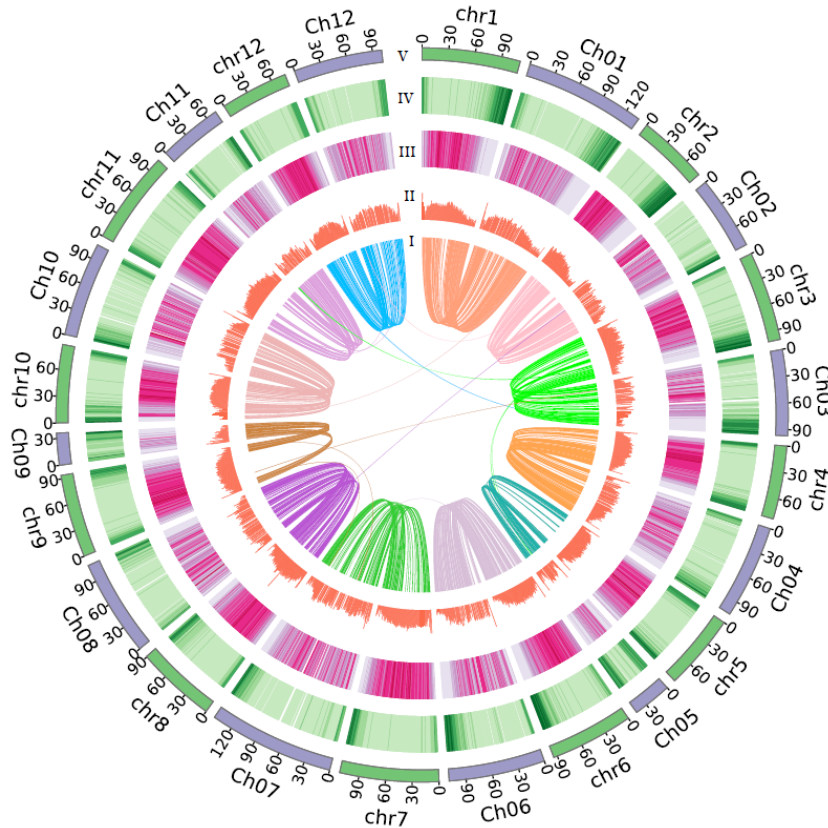

95

96

97 **Figure 1** Comparison of the eggplant assemblies. I: Syntenic alignments between the new eggplant  
98 assembly and Eggplant\_V3 assembly based on one-to-one orthologous genes processed by MCscan  
99 (Python version) with a C-score cutoff of 0.99 (links). II: GC content in non-overlapping 1-Mb  
100 windows (histograms). III: Percent coverage of transposable elements in non-overlapping 1-Mb  
101 windows (heat maps). IV: Gene density calculated on the basis of the number of genes in  
102 non-overlapping 1-Mb windows (heat maps). V: Lengths of pseudo-chromosomes (Mb) of the new  
103 eggplant assembly (green) and Eggplant\_V3 assembly (purple).

104

105 A total of 70.1% of the assembly was annotated as repetitive sequences using a combination of  
106 homology-based and *de novo* approaches (Table S6). This proportion was consistent with that  
107 reported previously [28]. Transposable elements (TEs) play an important role in shaping eukaryotic  
108 genomes and driving their evolution [34]. In the eggplant, TEs accounted for 68.9% of the genome  
109 size, with long terminal repeats (LTRs) being the most predominant type (63.9% of the genome size)  
110 (Table S7). The proportions of TEs and LTRs were both less than those in the pepper [29, 35] and  
111 more than those in tomato [30] and potato [36]. The most abundant LTRs were the *Gypsy* elements

112 (52%), followed by *Copia* (7.9%) (Table S7). This scenario was also observed in the sequenced  
113 pepper genome, indicating that the LTRs/*Gypsy* elements were the major driving force for the  
114 expansion of the eggplant genome. We then examined the insertion time of all LTRs based on  
115 sequence divergence. The eggplant appeared to have undergone a surge of retrotransposon  
116 amplification approximately 0.124 million years ago (Figure S3), suggesting that the expansion event  
117 was quite recent during its genome evolution.

118 To facilitate genome annotation of eggplant genes, we sequenced RNA samples from roots,  
119 stems, leaves, and flowers. The sequencing data were imported to the gene prediction pipeline, which  
120 also integrated homology-based and *de novo* strategies. We predicted 35,018 protein-coding genes,  
121 with an average gene length of 5,068 bp and an average of 4.7 exons per gene (Table S8). This  
122 number of genes is almost the same as that in tomato (35,768 genes), potato (39,028 genes), and  
123 pepper (35,845), indicating similar numbers of genes in this clade. The distribution of gene density  
124 was inversely correlated with TEs (Figure 1). BUSCO assessment of the predicted gene sets suggested  
125 96.6% completeness, of which 94.2% and 2.4% were single-copy and duplicated genes, respectively  
126 (Table S9), suggesting the integrity of our new eggplant gene annotation. Further functional  
127 annotation using public databases indicated that 31,963 (91.3%) genes could be classified using at  
128 least one of the databases and 19,466 (55.6%) genes could be annotated using all five databases  
129 (Table S10). In addition, a total of 6,520 noncoding RNAs (ncRNAs) were found in the eggplant  
130 genome, including 116 microRNAs (miRNAs), 1,254 transfer RNAs (tRNAs), 4,629 ribosomal RNAs  
131 (rRNAs), and 521 small nuclear RNAs (snRNAs) (Table S11).

132

### 133 **Genome comparison and gene family evolution**

134 Genome collinearity analysis of Solanaceae plants showed that some chromosomes were conserved;  
135 in particular, chromosomes 2, 6, and 7 retained a large percentage of collinear regions among  
136 eggplant, pepper, potato, and tomato (Figures 2a, S4).

137

138 (a)

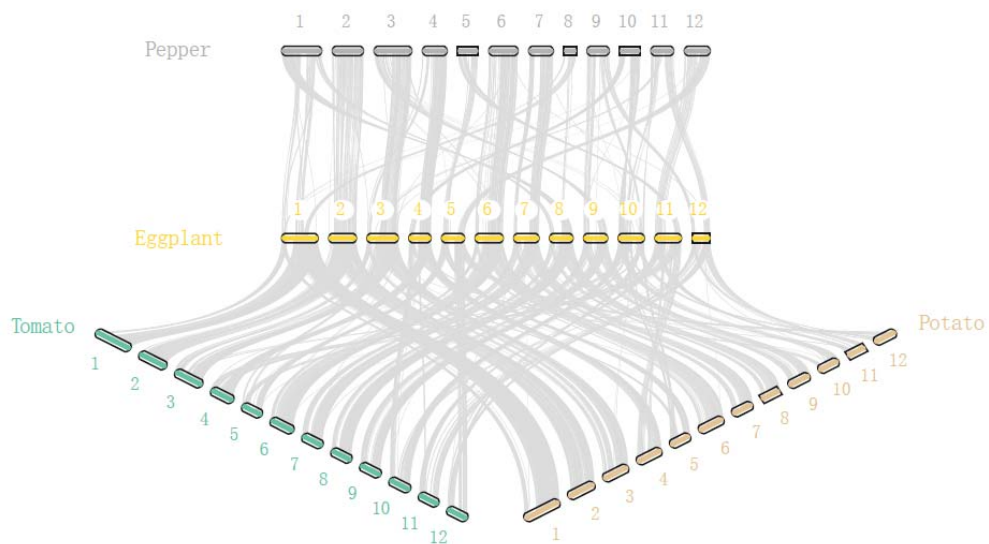

139

140 (b)

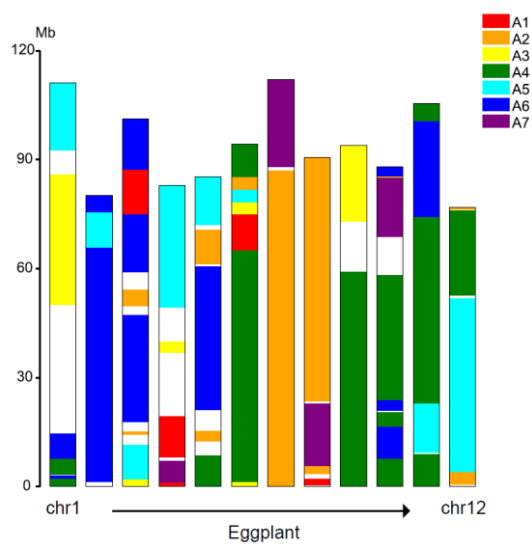

141

142

143 (c)

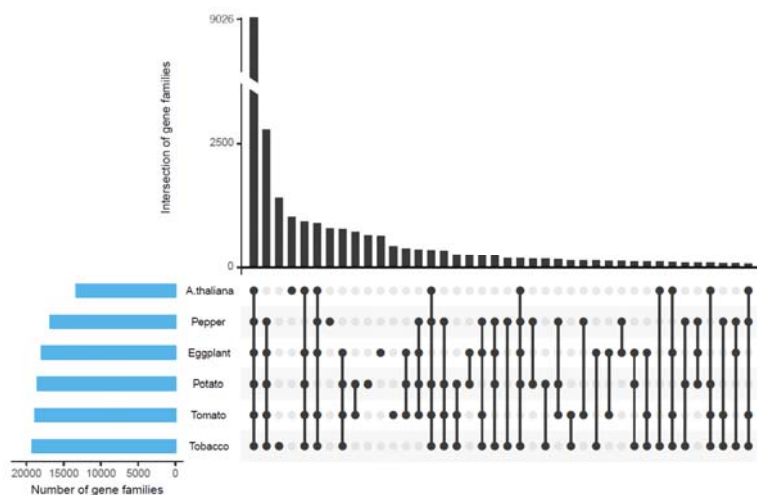

144

145 (d)

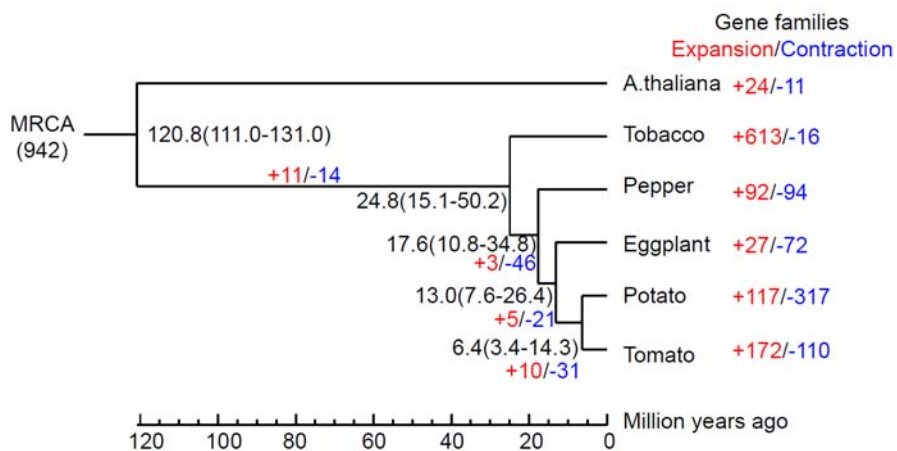

146

147 (e)



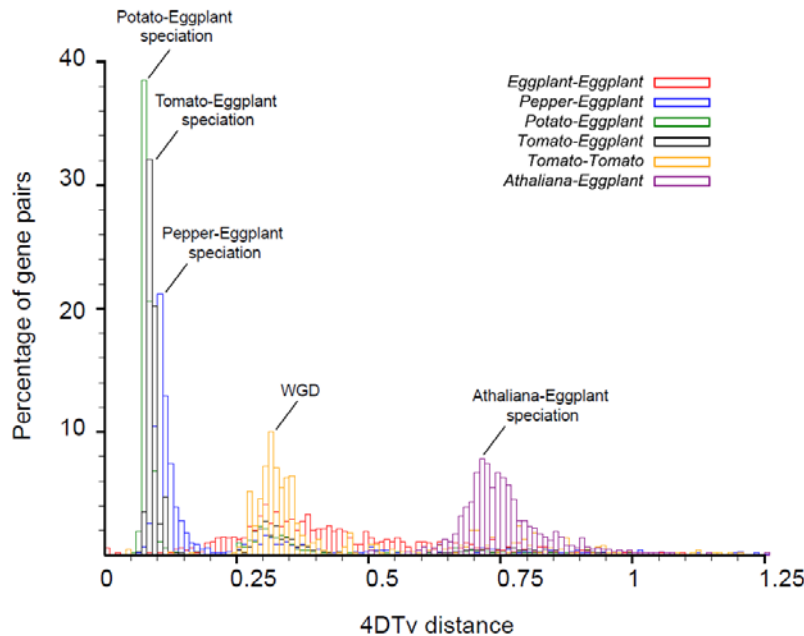

148

149 **Figure 2** Comparative analysis and evolution of the eggplant genome. (a) Analysis of the synteny  
150 among Solanaceae genomes. Macrosynteny connecting blocks of >30 one-to-one gene pairs is shown.  
151 (b) Genome evolution of the eggplant from the ancestral eudicot karyotype (AEKPre- $\gamma$ ) of seven  
152 protochromosomes. Colors indicate the origin from the seven AEKPre- $\gamma$  protochromosomes. White  
153 spaces represent chromosomal regions where ancestral origin was not assigned. (c) Intersections of  
154 gene families between six plant species (eggplant, pepper, potato, tobacco, tomato, and *Arabidopsis*  
155 *thaliana*). The figure was plotted using UpSetR [40], with the rows representing gene families and the  
156 columns representing their intersections. For each set that is part of a given intersection, a black filled  
157 circle is placed in the corresponding matrix cell. If a set is not part of the intersection, a light gray  
158 circle is shown. A vertical black line connects the topmost black circle with the bottommost black  
159 circle in each column to emphasize the column-based relationships. The size of the intersection is  
160 shown as a bar chart placed on top of the matrix so that each column lines up with exactly one bar. A  
161 second bar chart, showing the size of each set, is shown to the left of the matrix. (d) Phylogenetic tree  
162 with divergence times and history of orthologous gene families. Numbers on the nodes represent  
163 divergence times, with the error range shown in parentheses. The numbers of gene families that  
164 expanded (red) or contracted (blue) in each lineage after speciation are shown on the corresponding  
165 branch. MRCA, most recent common ancestor. (e) Genome duplication in Solanaceae genomes  
166 (pepper, tomato, potato, and eggplant) revealed by 4DTv analysis.

167

168 Based on the ancestral and lineage-specific whole-genome duplications reported for eudicots  
169 [37], we inferred genome evolution of the eggplant and other Solanaceae plants from the ancestral

170 eudicot karyotype (AEKPre- $\gamma$ ) of seven protochromosomes. Figure 2b shows the chromosomes of the  
171 eggplant, with the seven protochromosomes of AEKPre- $\gamma$  depicted in different colors. The map of the  
172 chromosomal regions that originated from different ancestral eudicot karyotypes (AEKs) is similar  
173 among eggplant, potato, and tomato (Figure S5 and Table S12) but much different from that of  
174 pepper. The pepper genome contains more predicted chromosomal regions, indicating that the  
175 genome of the pepper has undergone a much different process of genomic rearrangements to reach its  
176 current structure of 12 chromosomes, compared with that of the genomes of the other three  
177 solanaceous species.

178 We clustered the protein-coding genes of eggplant, pepper, potato, tobacco, tomato, and  
179 *Arabidopsis thaliana* into gene families (Table S13) and identified 25,620 gene families, of which  
180 9,026 were shared by all six species. The intersections of the gene families are illustrated in Figure 2c.  
181 There are 358 gene families shared among the eggplant, pepper, potato, and tomato. In the eggplant,  
182 26,596 genes were clustered into 17,926 gene families, of which 646 families were species-specific.  
183 Annotation of these specific genes showed various functions (Tables S14, S15), but they were  
184 particularly overrepresented in the chitin-related Gene Ontology (GO) categories. Chitin-binding  
185 genes are known as a pathogenesis-related gene family, which plays a fundamental role in the defense  
186 response of plants [38, 39]. This finding suggests possible response roles, related to biotic stress, in  
187 eggplant.

188 Analysis of evolution of gene families revealed that 27 gene families were expanded and 72 gene  
189 families were contracted in the eggplant (Figure 2d and Tables S16–S19). For the six plants, 799  
190 single-copy genes were used to construct a phylogenetic tree and estimate their divergence times  
191 (Figure 2d). The data showed that the eggplant was separated from potato and tomato ~12 million  
192 years ago during the Solanaceae evolution.

193 We then deduced whole-genome duplication (WGD) events in the eggplant based on the  
194 distribution of the distance-transversion rate at fourfold degenerate sites (4dTv methods) of  
195 paralogous gene pairs (Figure 2e). After the eggplant–*A. thaliana* speciation (peak at ~0.71), there  
196 occurred a common Solanaceae WGD event (peak at ~0.31). The divergence of eggplant–pepper  
197 occurred at a peak of ~0.1, followed by eggplant–tomato (4dTv = 0.08) and eggplant–potato (4dTv =  
198 0.07) divergence, which is consistent with the phylogenetic analysis. There is no evidence of an  
199 eggplant-specific WGD after the differentiation of *Solanum* plants.

200 In addition, we used the bidirectional best hit (BBH) method and recovered a total of 8,982  
201 one-to-one orthologous gene sets among the five Solanaceae plants for positive selection gene (PSG)  
202 detection. In the eggplant, 364 PSGs were identified [ $P < 0.05$ , likelihood ratio test (LRT)], which  
203 were especially enriched in GO terms related to intermembrane lipid transfer (three PSGs), regulation

204 of transcription, DNA-templated (24 PSGs), and DNA-binding transcription factor (TF) activity (16  
205 PSGs) (Tables S20, S21).

206

## 207 **Identification of genes involved in disease resistance**

208 In addition to a wide range of abiotic stresses such as the temperature, drought, and salt stress,  
209 eggplants are susceptible to a wide variety of biotic threats, including fungal pathogens and insect  
210 pests [41]. Most of the proteins encoded by the characterized resistance gene analogs (RGAs),  
211 including nucleotide-binding site (NBS)-containing proteins, receptor-like protein kinases (RLKs),  
212 and receptor-like proteins (RLPs), contain conserved domains, such as NBS, leucine-rich repeat  
213 (LRR), and Toll/interleukin-1 receptor (TIR) [42]. Using a genome-wide scanning pipeline [43], we  
214 identified 1,023 RGAs in the eggplant (Table S22), which was comparable to the number of RGAs in  
215 tomato, slightly lower than that in potato, and much lower than that in the pepper (Table 2). Pepper  
216 contains almost twice the total number of RGAs in each of the three *Solanum* spp., consequent to  
217 tandem duplication of genes, which also resulted in its genome expansion [29]. Half of RGAs in the  
218 eggplant belonged to the RLK category, and there were 285 NBS-related RGAs, of which 33 were of  
219 the TIR type. We noticed that over 80% of RGAs clustered near the head and tail of chromosomes,  
220 and this distribution pattern was consistent with the overall gene distribution in the eggplant genome.

221

222 **Table 2** Comparison of RGAs among four Solanaceae genomes.

| Species  | NBS encoding |     |     |    |    |     |    |        | RLP | RLK | TM-CC | Total |
|----------|--------------|-----|-----|----|----|-----|----|--------|-----|-----|-------|-------|
|          | NBS          | CNL | TNL | CN | TN | NL  | TX | Others |     |     |       |       |
| Eggplant | 82           | 65  | 21  | 18 | 12 | 75  | 11 | 1      | 84  | 511 | 143   | 1,023 |
| Tomato   | 64           | 66  | 22  | 13 | 9  | 83  | 13 | 1      | 87  | 533 | 148   | 1,039 |
| Potato   | 100          | 90  | 35  | 33 | 12 | 148 | 30 | 4      | 156 | 562 | 111   | 1,281 |
| Pepper   | 282          | 137 | 19  | 75 | 15 | 238 | 19 | 7      | 203 | 687 | 151   | 1,833 |

223 NBS, nucleotide-binding site; CC, coiled-coil; LRR, leucine-rich repeat; TIR, Toll/interleukin-1 receptor; TM,  
224 transmembrane; RLK, receptor-like kinase; RLP, receptor-like protein; CNL, CC-NBS-LRR; TNL,  
225 TIR-NBS-LRR; CN, CC-NBS; TN, TIR-NBS; NL, NBS-LRR; TX, TIR-unknown domain; Others, CC-TIR.

226

227           There were 15 RGAs overlapped with PSGs, including nine RLK-encoding RGAs, three  
228 encoding transmembrane coiled-coil-containing proteins, two encoding NBS-LRR-containing  
229 proteins, and one encoding a TIR-NBS-LRR-containing protein (Table S23). Among these, eight  
230 genes could be assigned to known resistance genes using the reference PR proteins from the latest  
231 PRGdb [44]. We inferred that these positively selected resistance genes probably played a  
232 fundamental role in eggplant self-defense. Further mining revealed an interesting orthoMCL group  
233 (129 genes), whose analysis indicated explosive gene expansion in eggplant (21 genes) and pepper  
234 (96 genes), in contrast to tomato (three genes) and potato (two genes). Tobacco had seven members in  
235 this group, while *Arabidopsis* did not have any. All of these genes were annotated using PRGdb as  
236 encoding bacterial spot resistance gene *BS2* (Table S24) [45]. In a maximum-likelihood phylogenetic  
237 tree, constructed using IQ-TREE [46], the 21 eggplant genes formed a monophyletic cluster (Figure  
238 S3) and, moreover, were found to be tandemly clustered at the head of chromosome 12. We inferred  
239 that the occurrence of these genes might be a consequence of tandem duplication events during  
240 eggplant genome evolution, which was also observed in pepper [29].

241

#### 242 **Identification of genes involved in CGA synthesis**

243 CGAs (esters of certain *trans*-cinnamic acids and quinic acid) are major phenolic metabolites in the  
244 eggplant, which typically account for 80% to 95% of total hydroxycinnamic acids in the fruit flesh  
245 [47, 48]. CGAs play a role in plant defense and as antioxidants and are accumulated in many  
246 Solanaceae plants [47, 49]. However, the CGA content in the eggplant has been reported to be  
247 roughly 10 and 100 times higher than that in tomato and potato, respectively [50]. CGA is well known  
248 to be beneficial for human health, mainly owing to its antioxidant, anti-inflammatory, antipyretic,  
249 anticarcinogenic, antimicrobial, analgesic, neuroprotective, cardioprotective, hypotensive,  
250 anti-obesity, and antidiabetic properties [48, 51]. Moreover, CGA is highly stable at high  
251 temperatures, and its content increases after cooking [52]. Thus, eggplant is considered to be the best  
252 source of CGA among the Solanaceae.

253           The biosynthesis of CGA occurs in eggplants through the phenylpropanoid pathway, which  
254 involves six key enzymes [47, 53]. The three initial steps, catalyzed by phenylalanine ammonia-lyase  
255 (*PAL*), cinnamate 4-hydroxylase (*C4H*), and 4-coumaroyl-CoA ligase (*4CL*), produce the intermediate  
256 *p*-coumaroyl-CoA (Figure 3a). Using homologous gene comparison, we identified six *PAL*, two *C4H*,  
257 and five *4CL* candidate genes in the eggplant genome (Figures 3b, S7 and Table S25). *Arabidopsis*  
258 contains four *PAL* genes, two of which (*AtPAL1* and *AtPAL2*) are associated with lignin and flavonoid  
259 biosynthesis [54]. Three eggplant *PAL* genes were in three distinct phylogenetic groups, and the other  
260 three clustered together, while the four *Arabidopsis* *PAL* genes formed a single clade (Figure S8).  
261 Overexpression of *AtPAL2* in tobacco resulted in a twofold increase in the CGA content [55]. *C4H* is

262 a cytochrome P450 (CYP) monooxygenase from the CYP73A subfamily, and only one member,  
 263 designated CYP73A5, exists in *Arabidopsis*. One *C4H* gene (EGP13151) in eggplant exhibited more  
 264 sequence identity with the *Arabidopsis* gene than did the other (EGP24021) (86% versus 65%,  
 265 respectively). Missense mutations in *C4H* result in metabolic changes, threatening plant survival [54,  
 266 56]. Downregulation of *C4H* resulted in a decrease of CGA levels in tobacco, as well as in a feedback  
 267 inhibition of *PAL* activity [57]. It has been reported that *Arabidopsis* contains four *4CL* genes, two of  
 268 which are involved in lignin biosynthesis, one is related to flavonoid biosynthesis, and the last one  
 269 preferentially towards erulate and sinapate instead of 4-coumarate [54]. The eggplant has five *4CL*  
 270 genes, which is similar to the number in the other three Solanaceae members but is only half of that in  
 271 tobacco (Figure 3b). Phylogenetic analysis revealed that each *4CL* was in a distinct clade (Figure S9).  
 272 A previous study has shown that the expression levels of *PAL*, *C4H*, and *4CL* in eggplants at the  
 273 commercially ripe stage were notably higher in the fruit flesh and skin than in other tissues, indicating  
 274 their correlation with the higher CGA content in the fruit [50].

275

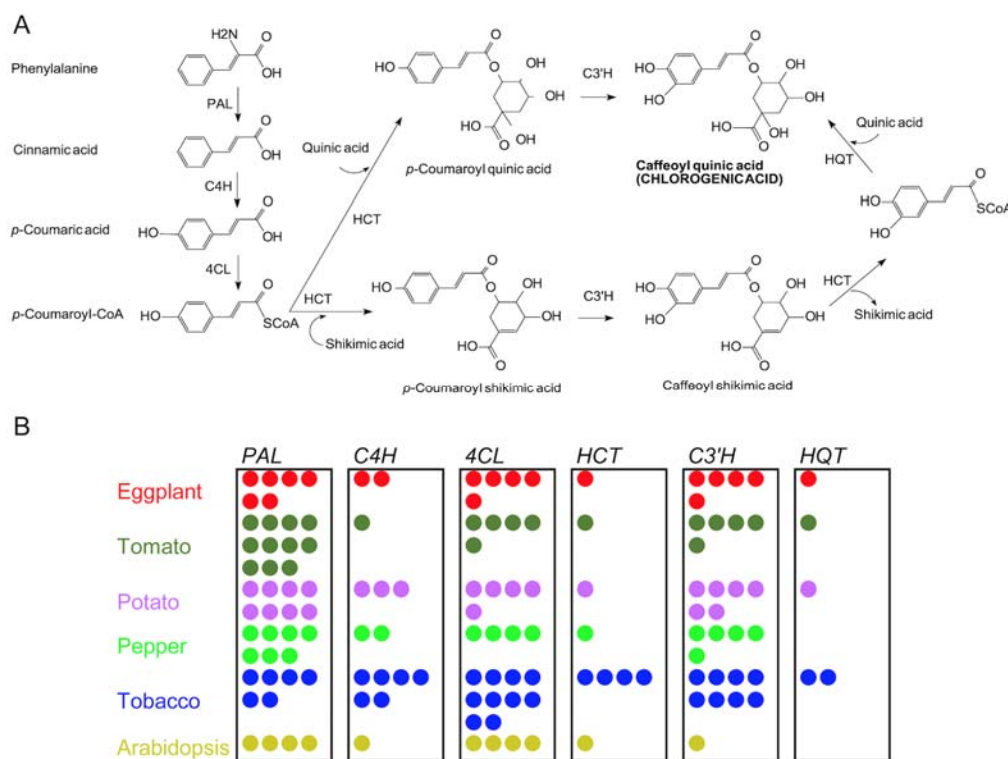

276

277 **Figure 3** Genes involved in chlorogenic acid (CGA) synthesis. (a) Biochemical pathway for CGA  
 278 synthesis in the eggplant. The enzymes involved are as follows: *PAL*, phenylalanine ammonia-lyase;  
 279 *C4H*, cinnamate 4-hydroxylase; *4CL*, 4-coumaroyl-CoA ligase; *HCT*,  
 280 hydroxycinnamoyl-CoA:shikimate hydroxycinnamoyl transferase; *C3'H*, *p*-coumaroyl ester

281 3'-hydroxylase; *HQT*, hydroxycinnamoyl-CoA:quinic hydroxycinnamoyl transferase. (b)  
282 Orthologous genes involved in CGA biosynthesis from eggplant (red), tomato (green), potato  
283 (purple), pepper (light green), tobacco (blue), and *Arabidopsis* (yellow), identified using orthoMCL,  
284 followed by manual inspection. Each circle represents one gene.

285

286 After the three initial steps in CGA biosynthesis, two possible pathways have been suggested  
287 (Figure 3a): (1) *p*-coumaroyl-CoA is converted into *p*-coumaroyl quinic acid with quinic acid via  
288 hydroxycinnamoyl-CoA:shikimate hydroxycinnamoyl transferase (*HCT*), followed by hydroxylation  
289 to form CGA via *p*-coumaroyl ester 3'-hydroxylase (*C3'H*); and (2) *p*-coumaroyl-CoA is converted  
290 into *p*-coumaroyl shikimic acid with shikimic acid via *HCT*, followed by hydroxylation to form  
291 caffeoyl shikimic acid via *C3'H*. Caffeoyl shikimic acid, catalyzed by *HCT*, is converted into  
292 caffeoyl-CoA, which is then converted into CGA by *trans*-esterification with quinic acid via  
293 hydroxycinnamoyl-CoA:quinic hydroxycinnamoyl transferase (*HQT*) [58]. *HCT* and *HQT* are  
294 closely related BAHD-like acyltransferases [59, 60], and both are encoded by single-copy genes in  
295 eggplant, tomato, and potato (Figure 3b and Table S25). However, *HQT* is absent in *Arabidopsis* and  
296 pepper. Overexpression of *HQT* in *AtPAL2*-overexpressing tobacco plants resulted in a 1.4-fold  
297 increase in the CGA content, while silencing of *HQT* resulted in a ~50% reduction in CGA [55]. In  
298 tomato, overexpression of *HQT* led to an increase in CGA accumulation, improving the plant  
299 antioxidant capacity and bacterial pathogen resistance [61]. RNAi suppression of *HQT* in potato  
300 resulted in a ~90% reduction in CGA and early flowering [62]. In the eggplant, the expression of *HQT*  
301 was the strongest in the fruit flesh and skin, compared with that in other tissues at the ripe stage [50].  
302 *C3'H* is a CYP monooxygenase belonging to the CYP98A subfamily; in *Arabidopsis* [63], *C3'H*  
303 (designated CYP98A3) is one of three members of this family (the other two members are  
304 AT1G74540-CYP98A8 and AT1G74550-CYP98A9). Unlike *Arabidopsis*, multiple homologs of  
305 *C3'H* were detected in the five Solanaceae species, including five *C3'H* genes in the eggplant. Similar  
306 to *4CL*, each *C3'H* was located in a distinct phylogenetic clade (Figure S10). We inferred that these  
307 gene duplications had evolved via independent processes, which led to divergent gene functions or  
308 neofunctionalization, responsible for the remarkable increase of CGA biosynthesis in the eggplant.

309 Polyphenol oxidases (PPOs), which oxidize specific phenolic substrates released from vacuoles  
310 upon tissue damage to highly reactive quinones, play key roles in plant defense mechanisms against  
311 pests and pathogens [64, 65]. However, oxidation of these high-level phenolics, including CGA,  
312 results in flesh browning, which negatively affects the apparent quality of eggplants [48]. In this  
313 respect, simultaneous breeding for a high CGA content and low PPO activity would result in cultivars  
314 with better fruit quality and reduced flesh browning [47]. We identified nine PPOs in the eggplant,  
315 with eight genes tandemly clustered at the end of chromosome 8 and one located on chromosome 2  
316 (Table S26 and Figure S7). Previously published studies discovered six PPO genes in the eggplant

317 [65], and five, except *PPO6*, could be anchored to chromosome 8 using a linkage map [48]. Protein  
318 sequence identities ranged from 92% to 99% when comparing these six genes to our dataset (Table  
319 S27). We further examined PPOs in other species. There were nine, eight, eight, and twelve PPO  
320 homologs in tomato, potato, pepper, and tobacco, respectively (Figure S11). The absence of *PPOs* in  
321 *Arabidopsis* has been discussed [66]. We also observed that the distribution patterns of PPO genes in  
322 the tomato and potato genomes were highly similar to that in the eggplant genome, with one located  
323 on chromosome 2 and the rest clustered at the end of chromosome 8 (Table S26), indicating a highly  
324 conserved synteny among the three solanaceous species.

325

### 326 **Identification of genes encoding transcription factors**

327 Plant secondary metabolism is regulated by TFs, which act as transcriptional activators or  
328 repressors [67, 68]. We identified 1,702 TF-encoding genes in the eggplant, representing 4.86% of the  
329 total genes. The number of members from each TF family in the eggplant was comparable to that in  
330 four other plants but was much lower than that of certain families in tobacco, such as bHLH, ERF,  
331 and NAC (Table S28). Genes encoding MYB TFs, containing conserved MYB DNA-binding  
332 domains, are a large family of functionally diverse genes, which can be classified into four  
333 subfamilies, 1R, R2R3, 3R, and 4R [67]. The R2R3 subfamily is the largest and considered to  
334 comprise the major phenylalanine-derived compound modulators in plants. We identified 121 MYB  
335 and 61 MYB-related TFs in the eggplant, of which 112 belonged to the R2R3 subfamily, and most of  
336 them could be categorized into 20 subgroups (Table S29) according to the previously characterized  
337 R2R3 genes in *Arabidopsis* [69, 70]. Several subgroups (SG4–SG7) have been found to regulate the  
338 phenylpropanoid pathway, including anthocyanin and flavonol biosynthesis [67]. We identified three  
339 SG3, four SG4, three SG6, and three SG7 genes in the eggplant. The *SmMyb1* gene, belonging to  
340 SG6, was reported to regulate CGA accumulation and anthocyanin biosynthesis [50]. No SG5  
341 members were identified based on the current criteria. We also found a gene cluster, which was  
342 located at the end of chromosome 7 and contained five members, four belonging to SG2 and one  
343 belonging to SG3, suggesting their key roles in regulating self-defense [71, 72].

344

### 345 **Conclusion**

346 We sequenced and assembled the genome of the eggplant and greatly improved the quality and  
347 integrity of the sequence compared with those of previously published draft sequences. As a vital crop  
348 in the Solanaceae, eggplants are cultivated and consumed worldwide. However, there have been much  
349 fewer studies of the eggplant than of other members of the Solanaceae, such as tomato and potato,  
350 which have been established as biological models for studying the development of fleshy fruits and

351 tubers, respectively. The main reason is due to the lack of a high-quality reference genome of the  
352 eggplant. Although a genome sequence of the inbred eggplant line ‘67/3’ has been published recently,  
353 our assembly showed several advantages, including a longer contig N50 (5.3 Mb vs. 16.7 kb), fewer  
354 total scaffolds (319 vs. 10,383), and a much smaller size of gaps (0.003% vs. 28.23%). Genome  
355 validation using a linkage map confirmed a high accuracy of our assembly.

356 We comprehensively characterized genes involved in disease resistance, CGA synthesis, and  
357 polyphenol oxidation, as well as those encoding TFs, thus demonstrating a significant value of the  
358 reference genome sequence. We also conducted comparative analysis of the eggplant genome with  
359 those of four other species of the Solanaceae and *Arabidopsis*. This study will facilitate the breeding of  
360 eggplant cultivars with strong disease resistance, high nutritional value, and low browning.

361

## 362 **Methods**

### 363 **Sample preparation**

364 Guiqie1 (*S. melongena*) plants were collected from the Vegetable Research Institute, Guangxi  
365 Academy of Agricultural Science (28°N and 118°E), Guangxi province, China. Roots, stems, leaves,  
366 and flowers of Guiqie1 were harvested, immediately frozen in liquid nitrogen, and stored at –80 °C  
367 until use. Genomic DNA was isolated from leaf tissues using the DNeasy plant mini kit (Qiagen).  
368 RNA was extracted using the RNeasy plant mini kit (Qiagen).

369

### 370 **DNA sequencing**

#### 371 *Illumina short-read sequencing*

372 Purified DNA was sheared using a focused ultrasonicator (Covaris) and then used for 350-bp  
373 paired-end library construction with the Next Ultra DNA library prep kit (NEB) for Illumina  
374 sequencing. Sequencing was performed on the Illumina NovaSeq platform.

#### 375 *SMRT long-read sequencing*

376 SMRTbell DNA libraries (~20 kb) were prepared using the BluePippin size selection system  
377 following the officially released PacBio protocol. Long reads were generated using the PacBio Sequel  
378 system.

#### 379 *Hi-C library construction and sequencing*



380 A Hi-C library was prepared using the Dovetail Hi-C library preparation kit. Briefly, nuclear  
381 chromatin was fixed in young eggplant seedlings with formaldehyde and extracted. Fixed chromatin  
382 was digested with *DpnII*, and sticky ends were filled in with biotinylated nucleotides and ligated.  
383 Then, crosslinks were reversed, and purified DNA was treated to remove any free biotin from ligated  
384 fragments. DNA was then sheared to a size of ~350 bp, and biotinylated fragments were enriched  
385 through streptavidin bead pulldown, followed by PCR amplification to generate the library. The  
386 library was sequenced on the Illumina NovaSeq platform.

387

### 388 **Genome assembly and evaluation**

389 A diploid contig assembly of the eggplant genome was carried out using FALCON, followed by  
390 FALCON-Unzip, integrated in the pb-assembly tool suite (v0.0.4). The resulting assembly contained  
391 primary contigs (partially phased haploid representation of the genome) and haplotigs (phased  
392 alternative alleles for a subset of the genome). Two rounds of contig polishing were performed. For  
393 the first round, as part of the FALCON-Unzip pipeline, primary contigs and secondary haplotigs were  
394 polished using haplotype-phased reads and the Quiver consensus caller. For the second round of  
395 polishing, we concatenated the primary contigs and haplotigs into a single reference and then mapped  
396 all raw reads to the combined assembly reference using pbmm2 (v0.12.0), followed by consensus  
397 calling with Arrow (GenomicConsensus v2.3.3). After a draft set of contigs was generated, the  
398 Dovetail Hi-C kit was run for Hi-C-based scaffolding with cloud-based HiRise software [73]. Finally,  
399 Pilon (v1.22) was used to correct errors introduced into the assembly from long reads.

400 To assess the completeness of the assembled eggplant genome, we performed BUSCO analysis by  
401 searching against the conserved 1,440 Embryophyta gene set (v3.0, lineage dataset  
402 `embryophyta_odb9`).

403

### 404 **Repeat annotation**

405 Tandem repetitive sequences were identified within the eggplant genome using Tandem Repeats Finder  
406 (v4.07). The interspersed repeats were determined using a combination of homology-based and *de novo*  
407 approaches. The homology-based approach, with the RepBase (v21), was used to identify TEs by  
408 searching against the eggplant genome assembly at the DNA and protein levels using RepeatMasker  
409 (v4.0.7; <http://www.repeatmasker.org/>) and ProteinRepeatMask (v4.0.7), respectively. A *de novo*  
410 repeat library was customized using RepeatModeler (v1.0.8) and LTR\_FINDER (v1.0.6) [74] and then  
411 imported to RepeatMasker to identify repetitive elements. Additionally, the results from LTR\_FINDER  
412 were integrated, and false positives were removed from the initial predictions using the LTR\_retriever

413 pipeline [75]. The insertion time was estimated as  $T = K/2\mu$ , where K is the divergence rate, and  $\mu$  is the  
414 neutral mutation rate. A neutral substitution rate of  $9.6 \times 10^{-9}$  was used for the eggplant [76].

415

#### 416 **Gene annotation**

417 Protein-coding gene predictions were conducted through a combination of homology-based, *de novo*,  
418 and transcriptome-based prediction methods. Proteins for six plant genomes (*A. thaliana*, *C. annuum*,  
419 *S. tuberosum*, *N. tabacum*, *S. lycopersicum*, and *S. melongena* SME\_r2.5.1) were downloaded from  
420 Phytozome (release 13), the National Center for Biotechnology Information (NCBI), and the Eggplant  
421 Genome DataBase. Protein sequences were aligned to the assembly using genblasta (v1.0.4).  
422 GeneWise (v2.4.1) was used to predict the exact gene structure of the corresponding genomic regions  
423 on each genblasta hit. Three *ab initio* gene prediction programs, Augustus (v3.2.1), GlimmerHMM  
424 (v3.0.4), and SNAP (v2006-07-28), were used to predict coding regions in the repeat-masked genome.  
425 Finally, RNA-seq data were mapped to the assembly using hisat2 (v2.0.1); stringtie (v1.2.2) and  
426 TransDecoder (v3.0.1) were then used to assemble the transcripts and identify candidate coding  
427 regions in gene models. All gene models predicted by the above three approaches were combined  
428 using EvidenceModeler into a non-redundant set of gene structures. The produced gene models were  
429 finally refined using PASA v2.3.3. Functional annotation of protein-coding genes was achieved using  
430 BLASTP (E-value:  $1e-05$ ) against two integrated protein sequence databases, SwissProt and  
431 TrEMBL. Protein domains were annotated using InterProScan (v5.30). The GO terms for each gene  
432 were extracted with InterProScan. The pathways in which genes might be involved were assigned  
433 using BLAST against the KEGG database (release 84.0), with an E-value cutoff of  $1e-05$ .

434 Four types of ncRNAs, namely, miRNAs, tRNAs, rRNAs, and snRNAs, were annotated. The  
435 tRNA genes were predicted using tRNAscan-SE (v1.3.1). The rRNA fragments were predicted  
436 through alignment to *Arabidopsis* and rice template rRNA sequences using BlastN (v2.2.24), with an  
437 E-value of  $1e-5$ . The miRNA and snRNA genes were determined by searching against the Rfam  
438 database (release 12.0) using INFERNAL (v1.1.1).

439

#### 440 **Genome comparison and gene family and phylogenetic analyses**

441 The AEK genes in the modern genome of the grape were obtained from Murat et al. [37]. Based on  
442 genome alignments using the cumulative identity percentage and cumulative alignment length  
443 percentage BLAST parameters [77], we identified homologous genes of AEK in the modern genomes  
444 of Solanaceae plants. Synteny blocks between the genomes of Solanaceae plants were detected using  
445 the GRIMM-Synteny software (<http://grimm.ucsd.edu/GRIMM/>), with groups of fewer than five

446 genes filtered out; then, the synteny blocks were assigned to the seven protochromosomes based on  
447 the homologous genes of AEK.

448 OrthoMCL (v2.0.9) [78] was used to cluster gene families from *A. thaliana*, *C. annuum*, *S.*  
449 *tuberosum*, *N. tabacum*, *S. lycopersicum*, and *S. melongena*. CAFÉ (v3.1) [79] was used to determine  
450 gene family expansion and contraction.

451 A total of 799 single-copy genes were used to construct a phylogenetic tree for the six plant  
452 genomes. Fourfold degenerate sites were extracted from each family and concatenated to form one  
453 supergene for each species. The GTR-gamma substitution model was selected, and PhyML (v3.0)  
454 [80] was used to reconstruct the phylogenetic tree. The divergence times among the six plants were  
455 estimated using the MCMCtree program (v4.4) as implemented in the Phylogenetic Analysis of  
456 Maximum Likelihood (PAML) package, with an independent rate clock and the JC69 nucleotide  
457 substitution model. The calibration times of divergence between *A. thaliana* and *S. lycopersicum*  
458 (111–131 million years ago) were obtained from the Time Tree database [81].

459 To detect PSGs in the eggplant genome, one-to-one orthologs were identified among the six  
460 plants using BLASTP, based on the BBH method with a sequence coverage >30% and identity >30%,  
461 followed by selection of the best match. A total of 8,982 one-to-one orthologous gene sets were found  
462 among *C. annuum*, *S. tuberosum*, *N. tabacum*, *S. lycopersicum*, and *S. melongena*. The branch-site  
463 model incorporated in the PAML package was used, with the eggplant used as the foreground branch  
464 and pepper, potato, and tomato used as background branches. The null model used in the branch-site  
465 test assumed that the Ka/Ks values for all codons in all branches were  $\leq 1$ , whereas the alternative  
466 model assumed that the foreground branch included codons evolving at  $Ka/Ks > 1$ . A maximum LRT  
467 was used to compare the two models. The *P*-value was calculated using the chi-squared distribution  
468 with one degree of freedom, and then *P*-values were adjusted for multiple testing using the false  
469 discovery rate (FDR) method. Genes were identified as positively selected when FDR was <0.05.  
470 Furthermore, we required that at least one amino acid site possessed a high probability of being  
471 positive selected (Bayes probability >95%). If no amino acid in PSG passed this cutoff, such gene was  
472 identified as false positive and excluded. GO enrichment was derived using Fisher's exact test and  
473 adjusted using the Benjamini–Hochberg method with the cutoff set at  $P < 0.05$ .

474

#### 475 **Identification of disease resistance genes**

476 The RGAugury pipeline (<https://bitbucket.org/yaanlpc/rgaugury>) [43] was used to screen the entire  
477 gene set for RGA prediction. The default *P*-value cutoff for initial RGA filtering was set to  $1e^{-5}$  for  
478 BLASTP.

479

#### 480 **Identification of CGA synthesis-related genes and phylogenetic analysis**

481 To identify CGA synthesis-related genes, homologous *Arabidopsis* genes were mined from the  
482 literature and downloaded. Corresponding gene family results were extracted and manually inspected.  
483 HMMER or BLASTP were used whenever necessary. Protein sequences were aligned using muscle  
484 (v3.8.31). Maximum-likelihood phylogenetic trees were constructed using IQ-TREE (v1.6.11), with  
485 1,000 bootstrap replicates, and further illustrated in MEGA (v7.0.26).

486

#### 487 **Identification and classification of TFs**

488 The Plant Transcription Factor Database v5.0 (planttfdb.cbi.pku.edu.cn) was used to identify TFs  
489 [82]. R2R3-MYB TFs were further characterized using the corresponding members in *Arabidopsis*  
490 [67, 69], and motifs were verified using MEME (v5.0.5) [83]. Subgroups were designated as  
491 previously reported [67, 70].

492

#### 493 **Availability**

494 The genome assembly and the sequencing data used for *de novo* whole-genome assembly are  
495 available from the China National GeneBank (CNGB) Nucleotide Sequence Archive (CNSA) under  
496 accession number CNP0000734.

497

#### 498 **Conflict of interest**

499 The authors declare no conflict of interest.

500

#### 501 **References**

- 502 1. Mueller, L.A., et al., *The SOL Genomics Network: a comparative resource for Solanaceae biology and*  
503 *beyond*. Plant Physiol, 2005. **138**(3): p. 1310-7.
- 504 2. Liu, J., et al., *Erratum to: Improving the resistance of eggplant (Solanum melongena) to Verticillium*  
505 *wilt using wild species Solanum linnaeanum*. Euphytica, 2015. **206**(3): p. 825-826.

- 506 3. Doganlar, S., et al., *Conservation of gene function in the solanaceae as revealed by comparative*  
507 *mapping of domestication traits in eggplant*. Genetics, 2002. **161**(4): p. 1713.
- 508 4. Knapp, S., M.S. Vorontsova, and J. Prohens, *Wild Relatives of the Eggplant (Solanum melongena L.:*  
509 *Solanaceae): New Understanding of Species Names in a Complex Group*. Plos One, 2013. **8**(2).
- 510 5. Rinaldi, R., et al., *New Insights on Eggplant/Tomato/Pepper Synteny and Identification of Eggplant and*  
511 *Pepper Orthologous QTL*. Frontiers in Plant Science, 2016. **7**(2016).
- 512 6. Saski, C., et al., *Complete chloroplast genome sequences of Hordeum vulgare, Sorghum bicolor and*  
513 *Agrostis stolonifera, and comparative analyses with other grass genomes*. Theoretical and Applied  
514 Genetics, 2007. **115**(4): p. 571-590.
- 515 7. Walker, P.J., *Understanding genomic evolution and segregation distortion in Solanaceae: A COSII*  
516 *linkage map in*. Dissertations & Theses - Gradworks, 2009.
- 517 8. Daniell, H., et al., *Complete chloroplast genome sequences of Solanum bulbocastanum, Solanum*  
518 *lycopersicum and comparative analyses with other Solanaceae genomes*. Theoretical & Applied  
519 Genetics, 2006. **112**(8): p. 1503.
- 520 9. Acquadro, A., L. Barchi, and P. Gramazio, *Coding SNPs analysis highlights genetic relationships and*  
521 *evolution pattern in eggplant complexes*. Plos One, 2017. **12**(7): p. e0180774.
- 522 10. Page, A., et al., *Eggplant domestication: pervasive gene flow, feralisation and transcriptomic*  
523 *divergence*. Mol Biol Evol, 2019.
- 524 11. Weese, T.L. and L. Bohs, *Eggplant origins: Out of Africa, into the Orient*. Taxon, 2010. **59**(1): p. 49-56.
- 525 12. Wei, Q., et al., *Comparative Transcriptome Analysis in Eggplant Reveals Selection Trends during*  
526 *Eggplant Domestication*. Int J Genomics, 2019. **2019**: p. 7924383.
- 527 13. Barchi, L., et al., *A chromosome-anchored eggplant genome sequence reveals key events in*  
528 *Solanaceae evolution*. Sci Rep, 2019. **9**(1): p. 11769.
- 529 14. Hirakawa, H., et al., *Draft Genome Sequence of Eggplant (Solanum melongena L.): the Representative*  
530 *Solanum Species Indigenous to the Old World*. DNA Research, 2014. **21**(6): p. 649-660.
- 531 15. Fukuoka, H., et al., *Development of gene-based markers and construction of an integrated linkage*  
532 *map in eggplant by using Solanum orthologous (SOL) gene sets*. Theoretical & Applied Genetics, 2012.  
533 **125**(1): p. 47-56.

- 534 16. Gramazio, P., et al., *Transcriptome analysis and molecular marker discovery in Solanum incanum and S.*  
535 *aethiopicum, two close relatives of the common eggplant (Solanum melongena) with interest for*  
536 *breeding*. BMC Genomics, 2016. **17**(1): p. 300.
- 537 17. Zhou, X.H., et al., *De Novo Sequencing and Analysis of the Transcriptome of the Wild Eggplant Species*  
538 *Solanum Aculeatissimum in Response to Verticillium dahliae*. Plant Molecular Biology Reporter, 2016.  
539 **34**(6): p. 1193-1203.
- 540 18. Zhou, X., et al., *Molecular Cloning and Characterization of a Wild Eggplant Solanum aculeatissimum*  
541 *NBS-LRR Gene, Involved in Plant Resistance to Meloidogyne incognita*. Int J Mol Sci, 2018. **19**(2).
- 542 19. Yongjun, H., et al., *Comparative transcription analysis of photosensitive and non-photosensitive*  
543 *eggplants to identify genes involved in dark regulated anthocyanin synthesis*. BMC genomics, 2019.  
544 **20**(1).
- 545 20. San José, R., et al., *Composition of eggplant cultivars of the Occidental type and implications for the*  
546 *improvement of nutritional and functional quality*. International Journal of Food Science &  
547 Technology, 2013. **48**(12): p. 2490-2499.
- 548 21. Lorenzo, B., et al., *Single Primer Enrichment Technology (SPET) for High-Throughput Genotyping in*  
549 *Tomato and Eggplant Germplasm*. Frontiers in plant science, 2019. **10**.
- 550 22. Di Donato, A., et al., *Investigation of orthologous pathogen recognition gene-rich regions in*  
551 *solanaceous species*. Genome, 2017. **60**(10): p. 850-859.
- 552 23. Andolfo, G., et al., *Defining the full tomato NB-LRR resistance gene repertoire using genomic and*  
553 *cDNA RenSeq*. BMC Plant Biology, 2014. **14**(1): p. 120.
- 554 24. Whitaker, B.D. and J.R. Stommel, *Distribution of hydroxycinnamic acid conjugates in fruit of*  
555 *commercial eggplant (Solanum melongena L.) cultivars*. Journal of Agricultural and Food Chemistry,  
556 2003. **51**(11): p. 3448-3454.
- 557 25. Alarcon-Flores, M.I., et al., *Systematic Study of the Content of Phytochemicals in Fresh and Fresh-Cut*  
558 *Vegetables*. Antioxidants (Basel), 2015. **4**(2): p. 345-58.
- 559 26. Youn, Y., et al., *Chlorogenic acid-rich Solanum melongena extract has protective potential against*  
560 *rotenone-induced neurotoxicity in PC-12 cells*. J Food Biochem, 2019: p. e12999.
- 561 27. Meinhart, A.D., et al., *Study of new sources of six chlorogenic acids and caffeic acid*. Journal of Food  
562 Composition and Analysis, 2019. **82**: p. 13.
- 563 28. Hirakawa, H., et al., *Draft genome sequence of eggplant (Solanum melongena L.): the representative*  
564 *solanum species indigenous to the old world*. DNA Res, 2014. **21**(6): p. 649-60.

- 565 29. Kim, S., et al., *Genome sequence of the hot pepper provides insights into the evolution of pungency in*  
566 *Capsicum species*. Nat Genet, 2014. **46**(3): p. 270-8.
- 567 30. Tomato Genome, C., *The tomato genome sequence provides insights into fleshy fruit evolution*.  
568 Nature, 2012. **485**(7400): p. 635-41.
- 569 31. Fukuoka, H., et al., *Development of gene-based markers and construction of an integrated linkage*  
570 *map in eggplant by using Solanum orthologous (SOL) gene sets*. Theor Appl Genet, 2012. **125**(1): p.  
571 47-56.
- 572 32. Li, H., *Aligning sequence reads, clone sequences and assembly contigs with BWA-MEM*.  
573 arXiv:1303.3997v2 [q-bio.GN], 2013.
- 574 33. Tang, H., et al., *ALLMAPS: robust scaffold ordering based on multiple maps*. Genome Biol, 2015. **16**: p.  
575 3.
- 576 34. Feschotte, C., N. Jiang, and S.R. Wessler, *Plant transposable elements: where genetics meets*  
577 *genomics*. Nat Rev Genet, 2002. **3**(5): p. 329-41.
- 578 35. Qin, C., et al., *Whole-genome sequencing of cultivated and wild peppers provides insights into*  
579 *Capsicum domestication and specialization*. Proc Natl Acad Sci U S A, 2014. **111**(14): p. 5135-40.
- 580 36. Potato Genome Sequencing, C., et al., *Genome sequence and analysis of the tuber crop potato*.  
581 Nature, 2011. **475**(7355): p. 189-95.
- 582 37. Murat, F., et al., *Reconstructing the genome of the most recent common ancestor of flowering plants*.  
583 Nat Genet, 2017. **49**(4): p. 490-496.
- 584 38. Ali, M., et al., *Classification and Genome-Wide Analysis of Chitin-Binding Proteins Gene Family in*  
585 *Pepper (Capsicum annuum L.) and Transcriptional Regulation to Phytophthora capsici, Abiotic Stresses*  
586 *and Hormonal Applications*. Int J Mol Sci, 2018. **19**(8).
- 587 39. Chen, C.S., et al., *Functional characterization of chitin-binding lectin from Solanum integrifolium*  
588 *containing anti-fungal and insecticidal activities*. BMC Plant Biol, 2018. **18**(1): p. 3.
- 589 40. Conway, J.R., A. Lex, and N. Gehlenborg, *UpSetR: an R package for the visualization of intersecting*  
590 *sets and their properties*. Bioinformatics, 2017. **33**(18): p. 2938-2940.
- 591 41. Morris, W.L. and M.A. Taylor, *The Solanaceous Vegetable Crops: Potato, Tomato, Pepper, and*  
592 *Eggplant*. Encyclopedia of Applied Plant Sciences (Second Edition), 2017: p. 55-58.
- 593 42. van Ooijen, G., et al., *Structure and function of resistance proteins in solanaceous plants*. Annu Rev  
594 Phytopathol, 2007. **45**: p. 43-72.

- 595 43. Li, P., et al., *RGAugury: a pipeline for genome-wide prediction of resistance gene analogs (RGAs) in*  
596 *plants*. BMC Genomics, 2016. **17**(1): p. 852.
- 597 44. Osuna-Cruz, C.M., et al., *PRGdb 3.0: a comprehensive platform for prediction and analysis of plant*  
598 *disease resistance genes*. Nucleic Acids Res, 2018. **46**(D1): p. D1197-D1201.
- 599 45. Tai, T.H., et al., *Expression of the Bs2 pepper gene confers resistance to bacterial spot disease in*  
600 *tomato*. Proc Natl Acad Sci U S A, 1999. **96**(24): p. 14153-8.
- 601 46. Nguyen, L.T., et al., *IQ-TREE: a fast and effective stochastic algorithm for estimating*  
602 *maximum-likelihood phylogenies*. Mol Biol Evol, 2015. **32**(1): p. 268-74.
- 603 47. Plazas, M., et al., *Breeding for chlorogenic acid content in eggplant: interest and prospects*. Notulae  
604 Botanicae Horti Agrobotanici Cluj-Napoca, 2013. **41**(1): p. 26-35.
- 605 48. Gramazio, P., et al., *Location of chlorogenic acid biosynthesis pathway and polyphenol oxidase genes*  
606 *in a new interspecific anchored linkage map of eggplant*. BMC Plant Biol, 2014. **14**: p. 350.
- 607 49. Korkina, L., *Phenylpropanoids as naturally occurring antioxidants: from plant defense to human*  
608 *health*. Cellular & Molecular Biology, 2007. **53**(1): p. 15-25.
- 609 50. Docimo, T., et al., *Phenylpropanoids Accumulation in Eggplant Fruit: Characterization of Biosynthetic*  
610 *Genes and Regulation by a MYB Transcription Factor*. Front Plant Sci, 2015. **6**: p. 1233.
- 611 51. dos Santos, M.D., et al., *Evaluation of the anti-inflammatory, analgesic and antipyretic activities of the*  
612 *natural polyphenol chlorogenic acid*. Biol Pharm Bull, 2006. **29**(11): p. 2236-40.
- 613 52. Lo Scalzo, R., et al., *Thermal treatment of eggplant (Solanum melongena L.) increases the antioxidant*  
614 *content and the inhibitory effect on human neutrophil burst*. J Agric Food Chem, 2010. **58**(6): p.  
615 3371-9.
- 616 53. Vogt, T., *Phenylpropanoid biosynthesis*. Mol Plant, 2010. **3**(1): p. 2-20.
- 617 54. Fraser, C.M. and C. Chapple, *The phenylpropanoid pathway in Arabidopsis*. Arabidopsis Book, 2011. **9**:  
618 p. e0152.
- 619 55. Chang, J., J. Luo, and G. He, *Regulation of polyphenols accumulation by combined*  
620 *overexpression/silencing key enzymes of phenylpropanoid pathway*. Acta Biochim Biophys Sin  
621 (Shanghai), 2009. **41**(2): p. 123-30.
- 622 56. Schillmiller, A.L., et al., *Mutations in the cinnamate 4-hydroxylase gene impact metabolism, growth*  
623 *and development in Arabidopsis*. Plant J, 2009. **60**(5): p. 771-82.



- 624 57. Blount, J.W., et al., *Altering expression of cinnamic acid 4-hydroxylase in transgenic plants provides*  
625 *evidence for a feedback loop at the entry point into the phenylpropanoid pathway.* Plant Physiol,  
626 2000. **122**(1): p. 107-16.
- 627 58. Ferro, A.M., et al., *Impact of novel SNPs identified in Cynara cardunculus genes on functionality of*  
628 *proteins regulating phenylpropanoid pathway and their association with biological activities.* BMC  
629 Genomics, 2017. **18**(1): p. 183.
- 630 59. D'Auria, J.C., *Acyltransferases in plants: a good time to be BAHD.* Curr Opin Plant Biol, 2006. **9**(3): p.  
631 331-40.
- 632 60. Lallemand, L.A., et al., *A structural basis for the biosynthesis of the major chlorogenic acids found in*  
633 *coffee.* Plant Physiol, 2012. **160**(1): p. 249-60.
- 634 61. Niggeweg, R., A.J. Michael, and C. Martin, *Engineering plants with increased levels of the antioxidant*  
635 *chlorogenic acid.* Nat Biotechnol, 2004. **22**(6): p. 746-54.
- 636 62. Payyavula, R.S., et al., *Synthesis and regulation of chlorogenic acid in potato: Rerouting*  
637 *phenylpropanoid flux in HQT-silenced lines.* Plant Biotechnol J, 2015. **13**(4): p. 551-64.
- 638 63. Schoch, G., et al., *CYP98A3 from Arabidopsis thaliana is a 3<sup>1</sup>-hydroxylase of phenolic esters, a missing*  
639 *link in the phenylpropanoid pathway.* J Biol Chem, 2001. **276**(39): p. 36566-74.
- 640 64. Docimo, T., et al., *Insights in the Fruit Flesh Browning Mechanisms in Solanum melongena Genetic*  
641 *Lines with Opposite Postcut Behavior.* J Agric Food Chem, 2016. **64**(22): p. 4675-85.
- 642 65. Shetty, S.M., A. Chandrashekar, and Y.P. Venkatesh, *Eggplant polyphenol oxidase multigene family:*  
643 *cloning, phylogeny, expression analyses and immunolocalization in response to wounding.*  
644 Phytochemistry, 2011. **72**(18): p. 2275-87.
- 645 66. Tran, L.T., J.S. Taylor, and C.P. Constabel, *The polyphenol oxidase gene family in land plants:*  
646 *Lineage-specific duplication and expansion.* BMC Genomics, 2012. **13**: p. 395.
- 647 67. Dubos, C., et al., *MYB transcription factors in Arabidopsis.* Trends Plant Sci, 2010. **15**(10): p. 573-81.
- 648 68. Zhou, H., et al., *Activator-type R2R3-MYB genes induce a repressor-type R2R3-MYB gene to balance*  
649 *anthocyanin and proanthocyanidin accumulation.* New Phytol, 2019. **221**(4): p. 1919-1934.
- 650 69. Stracke, R., M. Werber, and B. Weisshaar, *The R2R3-MYB gene family in Arabidopsis thaliana.* Curr  
651 Opin Plant Biol, 2001. **4**(5): p. 447-56.
- 652 70. Kranz, H.D., et al., *Towards functional characterisation of the members of the R2R3-MYB gene family*  
653 *from Arabidopsis thaliana.* Plant J, 1998. **16**(2): p. 263-76.

- 654 71. Ding, Z., et al., *Transgenic expression of MYB15 confers enhanced sensitivity to abscisic acid and*  
655 *improved drought tolerance in Arabidopsis thaliana*. J Genet Genomics, 2009. **36**(1): p. 17-29.
- 656 72. Agarwal, M., et al., *A R2R3 type MYB transcription factor is involved in the cold regulation of CBF*  
657 *genes and in acquired freezing tolerance*. J Biol Chem, 2006. **281**(49): p. 37636-45.
- 658 73. Putnam, N.H., et al., *Chromosome-scale shotgun assembly using an in vitro method for long-range*  
659 *linkage*. Genome Res, 2016. **26**(3): p. 342-50.
- 660 74. Xu, Z. and H. Wang, *LTR\_FINDER: an efficient tool for the prediction of full-length LTR*  
661 *retrotransposons*. Nucleic Acids Res, 2007. **35**(Web Server issue): p. W265-8.
- 662 75. Ou, S. and N. Jiang, *LTR\_retriever: A Highly Accurate and Sensitive Program for Identification of Long*  
663 *Terminal Repeat Retrotransposons*. Plant Physiol, 2018. **176**(2): p. 1410-1422.
- 664 76. Wang, Y., et al., *Sequencing and comparative analysis of a conserved syntenic segment in the*  
665 *Solanaceae*. Genetics, 2008. **180**(1): p. 391-408.
- 666 77. Salse, J., et al., *Improved criteria and comparative genomics tool provide new insights into grass*  
667 *paleogenomics*. Brief Bioinform, 2009. **10**(6): p. 619-30.
- 668 78. Li, L., C.J. Stoeckert, Jr., and D.S. Roos, *OrthoMCL: identification of ortholog groups for eukaryotic*  
669 *genomes*. Genome Res, 2003. **13**(9): p. 2178-89.
- 670 79. De Bie, T., et al., *CAFE: a computational tool for the study of gene family evolution*. Bioinformatics,  
671 2006. **22**(10): p. 1269-71.
- 672 80. Guindon, S., et al., *New algorithms and methods to estimate maximum-likelihood phylogenies:*  
673 *assessing the performance of PhyML 3.0*. Syst Biol, 2010. **59**(3): p. 307-21.
- 674 81. Hedges, S.B., J. Dudley, and S. Kumar, *TimeTree: a public knowledge-base of divergence times among*  
675 *organisms*. Bioinformatics, 2006. **22**(23): p. 2971-2.
- 676 82. Jin, J., et al., *PlantTFDB 4.0: toward a central hub for transcription factors and regulatory interactions*  
677 *in plants*. Nucleic Acids Res, 2017. **45**(D1): p. D1040-D1045.
- 678 83. Bailey, T.L., et al., *The MEME Suite*. Nucleic Acids Res, 2015. **43**(W1): p. W39-49.

679

## 680 **Supporting information**

681 Additional supporting information may be found online in the Supporting Information section at the  
682 end of the article.
